# Supplementary material for: Optimized synthesis of a tert-butyl-phenyl-substituted tetrapyridophenazine ligand and its Ru(ii) complexes and determination of dimerization behaviour of the complexes through supramolecular “Fingerhakel”
Source: Royal Society of Chemistry journal article supplement (doi:10.1039/c5dt00214a), 2015-01-01
Supplement: c5dt00214a1.pdf [file c5dt00214a1.pdf]

## Molecular “Fingerhaken”\* based on multiple $\pi$ -interactions

K. Ritter,<sup>a</sup> C. Pehlken,<sup>a</sup> D. Sorsche,<sup>a</sup> and S. Rau<sup>a</sup>

Supplementary Information (27 pages total)

|                                                                                   |    |
|-----------------------------------------------------------------------------------|----|
| 1. Pictures for elucidation of “Fingerhaken” .....                                | 2  |
| 2. Concentration dependent <sup>1</sup> H-NMR spectra .....                       | 2  |
| 3. Peak assignment in the <sup>1</sup> H-NMR spectra.....                         | 3  |
| 4. Comments on the modified methodology of the calculation $K_D$ of Rutpphz ..... | 4  |
| 5. Details to the calculation on the dimerization constant $K_D$ .....            | 5  |
| 6. Change of the photophysical properties of tpphz(tbp) <sub>2</sub> .....        | 9  |
| 7. Details to the crystal structures .....                                        | 10 |

## 1. Pictures for elucidation of “Fingerhakel”

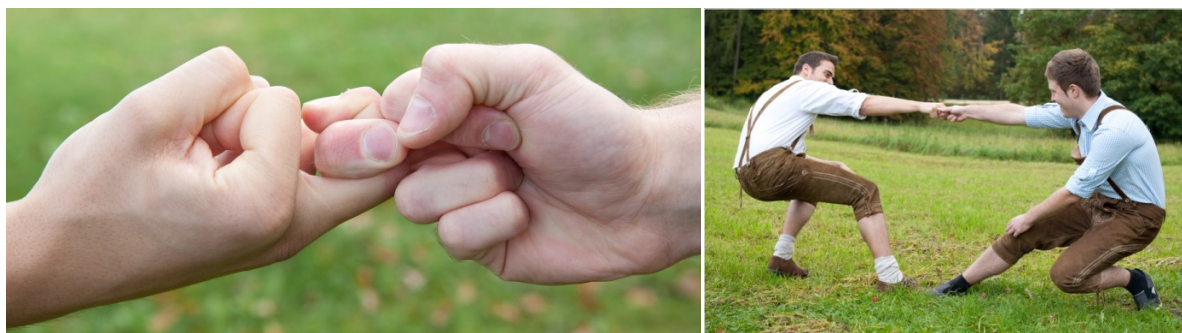

## 2. Concentration dependent $^1\text{H}$ -NMR spectra

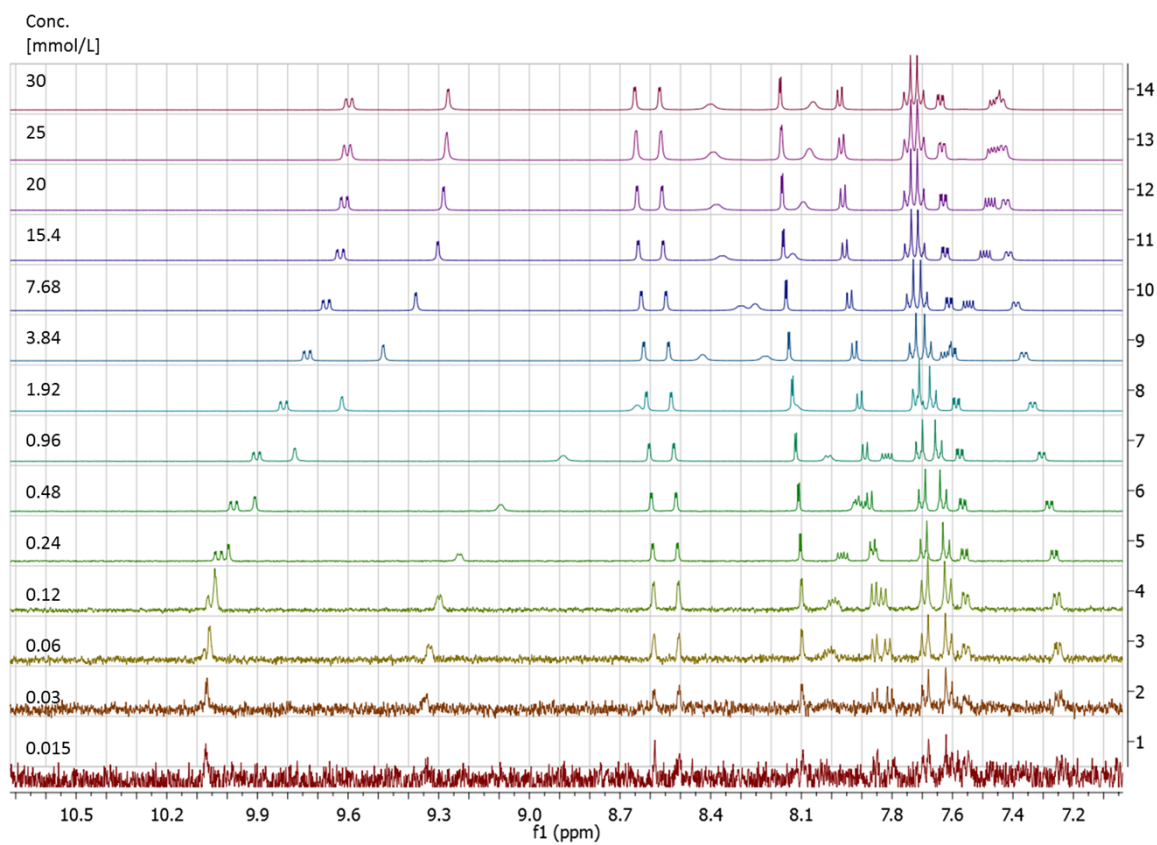

Figure 1: concentration dependent  $^1\text{H}$ -NMR spectra of  $\text{Ru}(\text{tbp})_2\text{tpphz}$  as a  $\text{PF}_6$  salt in Acetonitrile.

### 3. Peak assignment in the $^1\text{H-NMR}$ spectra

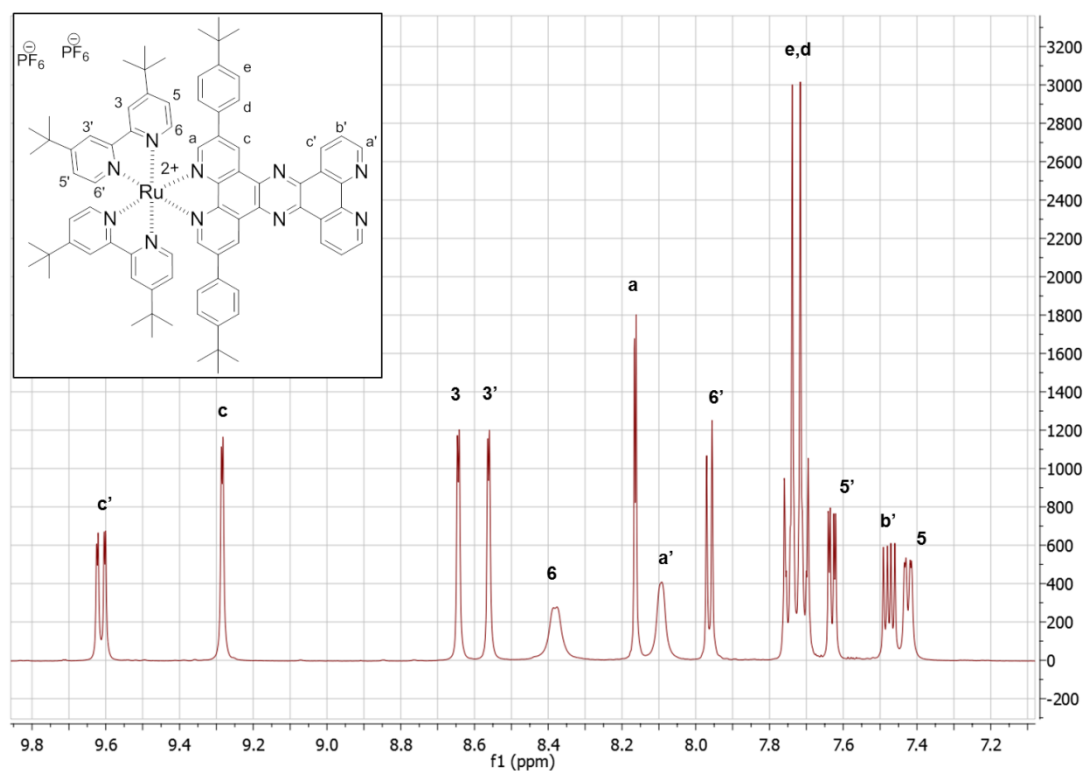

Figure 3: H-NMR of  $\text{Ru}(\text{tpb})_2\text{tpphz}$  (20 mM) in Acetonitrile. The assignment of the signals was carried out with the aid of different NMR-techniques (COSY, HSQC, HMBC).

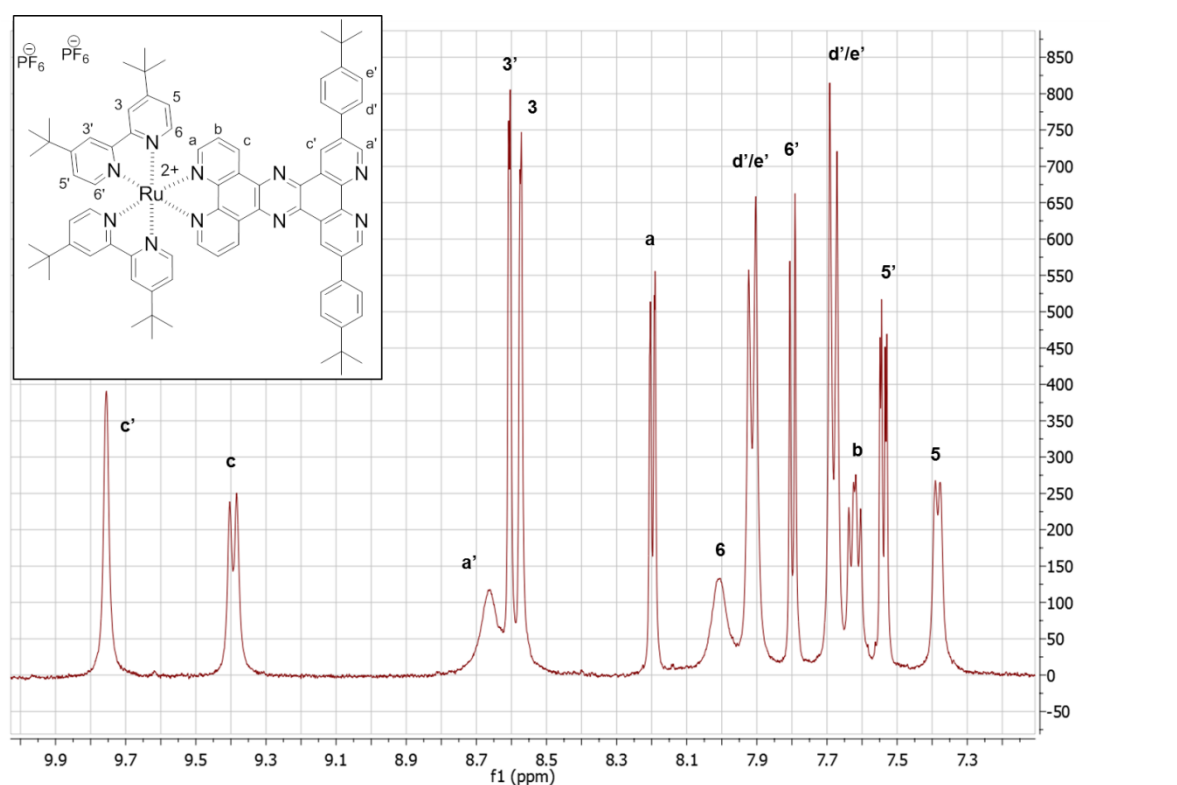

Figure 4: H-NMR of  $\text{Ru}(\text{tpphz})(\text{tpb})_2$  (1.92 mM) in Acetonitrile. The assignment of the signals was carried out with the aid of different NMR-techniques (COSY, HSQC, HMBC) and analogy.

#### 4. Comments on the modified methodology of the calculation $K_D$ of **Rutpphz**

This publication introduces a different value for  $K_D$  of **Rutpphz** ( $Ru = Ru^{2+}(tbbpy)_2$ ,  $tbbpy = 4,4'$ -di-*tert.*-butyl-2,2'-bipyridine and  $tpphz = \text{tetrapyrido}[3,2-a:2',3':c:3'',2'']\text{-}h:2''',3'''\text{-}j$ ]phenazine) than the cited article in this publication (Ref. 5 of manuscript):  $289 \pm 17 \text{ M}^{-1}$  (new) against  $122 \pm 19 \text{ M}^{-1}$  (old). This deviation is caused by the use of more data points and a modification of the methodology of the calculation of the dimerization constant, which improves the accuracy of the calculation. The old value of the dimerization constant was produced by taking the average of the determined constants of the  $^1\text{H-NMR}$  signals of two protons of the  $tpphz$  ligand, yielded from local non linear least squares fit curves.<sup>1,2</sup> The disadvantages of this method are a relatively high standard error of 15.6 % and the fact that the effect of the interaction is analyzed using only two protons. The concentration dependent  $^1\text{H-NMR}$  spectra of **Rutpphz** however show that the interaction influences the ppm value of nearly every proton. Thus the change of the signal position of more than two protons should be usable for the determination of the dimerization constant.

Consequently the new value was determined by the use of global non linear least squares curve fitting of the  $^1\text{H-NMR}$  signals of five protons. The use of this modified methodology together with more data points yielded a reduction of the percentage of the standard error from 15.6 % to 5.9 %. All other effects and details of this modification of the calculation methodology will be described and a separate publication, which is written at the time. The overall advantages of global fitting over local approaches are also described by P. Thordarson.<sup>3</sup>

---

<sup>1</sup> V. Steullet and D. W. Dixon, *Chem. Soc., Perkin Trans. 2*, 1999, 1547.

<sup>2</sup> N. R. de Tacconi, R. Chitakunye, F. M. MacDonnell and R. O. Lezna, *J. Phys. Chem. A*, 2008, **112**, 497.

<sup>3</sup> P. Thordarson, *Chem. Soc. Rev.*, 2011, **40**, 1305.

## 5. Details to the calculation on the dimerization constant $K_D$

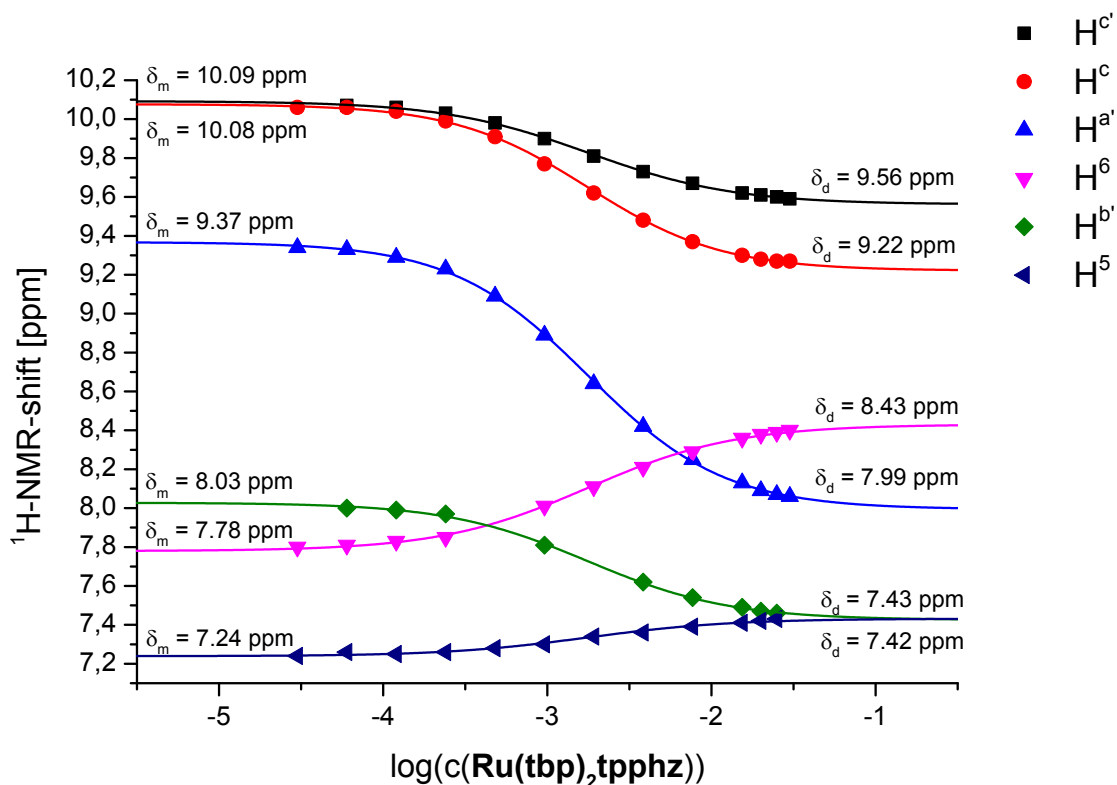

Figure 5: Plot of the shift of the ppm values of the protons  $c'$ ,  $c$ ,  $a'$ ,  $6$ ,  $b'$  and  $5$  of  $\text{Ru}(\text{tbp})_2\text{tpphz}$  versus the logarithm of the concentration of the complex. Extrapolation of the data points with a Boltzmann function yields the ppm values of the pure monomer ( $\delta_m$ ) and the pure dimer ( $\delta_d$ ).<sup>4</sup>

$$y = A2 + \frac{(A1 - A2)}{\left(1 + e^{\left(\frac{x - x_0}{dx}\right)}\right)}$$

Fit statistics: reduced  $\chi^2 = 4.77 \cdot 10^{-5}$ , adjusted  $R^2 = 1$ .

Fit parameters:  $x_0$  is shared for all curves due to the global fit;  $A1 = \delta_m$ ,  $A2 = \delta_d$ ,  $x = c(\text{Ru}(\text{tbp})_2\text{tpphz})$  and  $y = {}^1\text{H-NMR-shift}$ .  $dx$  is adjusted during the fit.

<sup>4</sup> V. Steullet and D. W. Dixon, *Chem. Soc., Perkin Trans. 2*, **1999**, 1547.

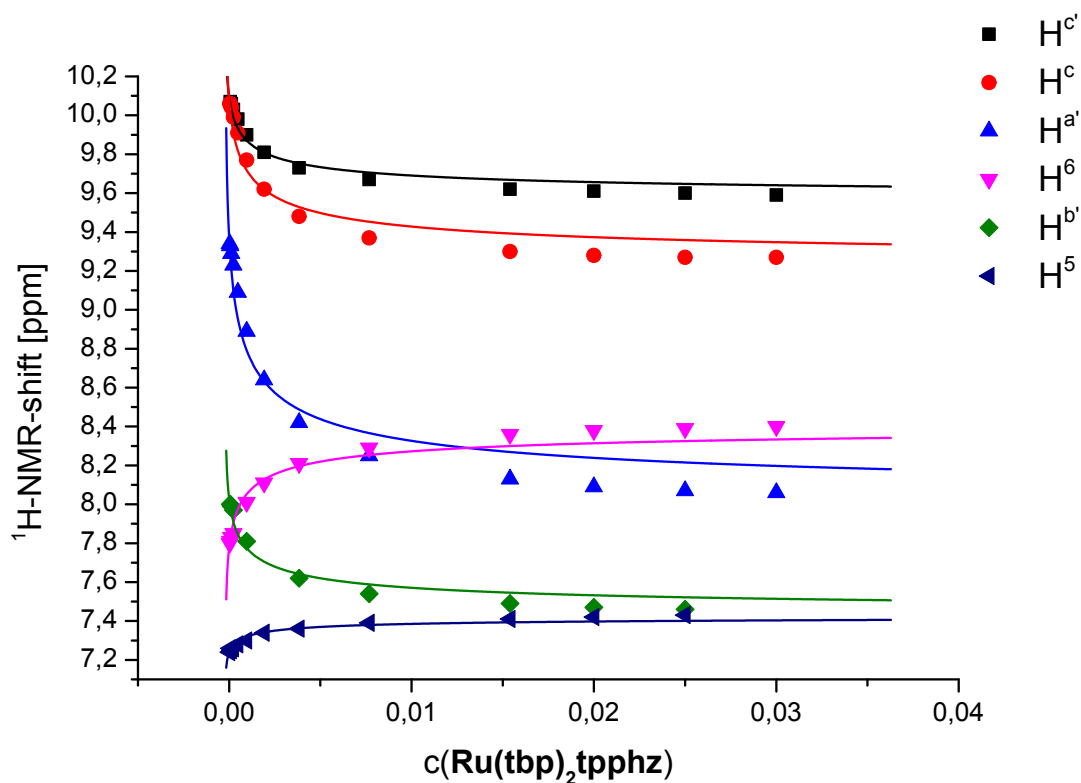

Figure 6: Plot of the shift of the ppm values of the protons  $c'$ ,  $c$ ,  $a'$ ,  $6$ ,  $b'$  and  $5$  of  $\text{Ru}(\text{tbp})_2\text{tpphz}$  versus the concentration of the complex. The data points were treated with a least squares global fitting procedure using the following equation to yield the Dimerization constant  $K_D = 647 \pm 46 \text{ M}^{-1.5}$

$$\delta_{obs} = \delta_m + (\delta_d - \delta_m) \frac{\sqrt{1 + 8K_D[M]} - 1}{\sqrt{1 + 8K_D[M]} + 1}$$

Fit statistics: reduced  $\chi^2 = 0,00301$ , adjusted  $R^2 = 0.99972$ .

Fit parameters:  $K_D$  is shared for all curves due to the global fit;  $\delta_m$  and  $\delta_d$  were set as a constant for each proton using the values shown in Figure 5.

<sup>5</sup> J.-S. Chen and R. B. Shirts, *The Journal of Physical Chemistry*, **1985**, *89*, 1643.

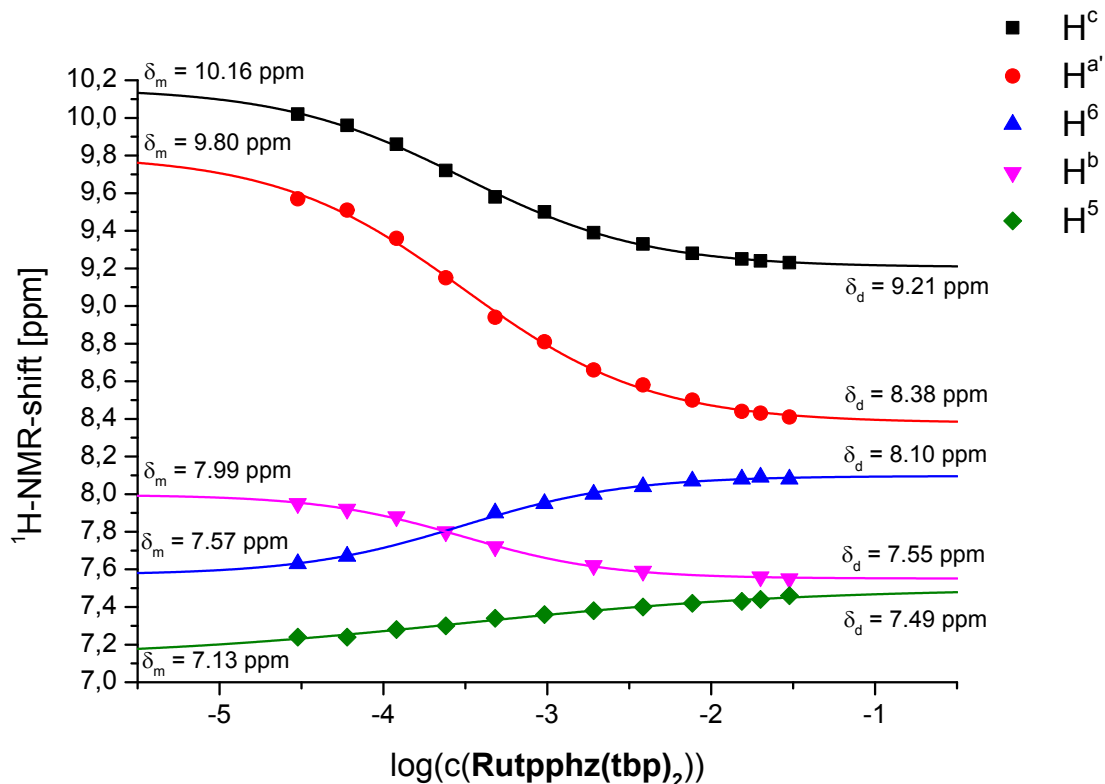

Figure 7: Plot of the shift of the ppm values of the protons c, a', 6, b and 5 of **Rutpphz(tbp)<sub>2</sub>** versus the logarithm of the concentration of the complex. Extrapolation of the data points with a Boltzmann function yields the ppm values of the pure monomer ( $\delta_m$ ) and the pure dimer ( $\delta_d$ ).<sup>4</sup>

$$y = A2 + \frac{(A1 - A2)}{\left(1 + e^{\left(\frac{x - x_0}{dx}\right)}\right)}$$

Fit statistics: reduced  $\chi^2 = 1.55 \cdot 10^{-4}$ , adjusted  $R^2 = 0.99979$ .

Fit parameters:  $x_0$  is shared for all curves due to the global fit;  $A1 = \delta_m$ ,  $A2 = \delta_d$ ,  $x = c(\text{Rutpphz}(\text{tbp})_2)$  and  $y = {}^1\text{H-NMR-shift}$ .  $dx$  is adjusted during the fit.

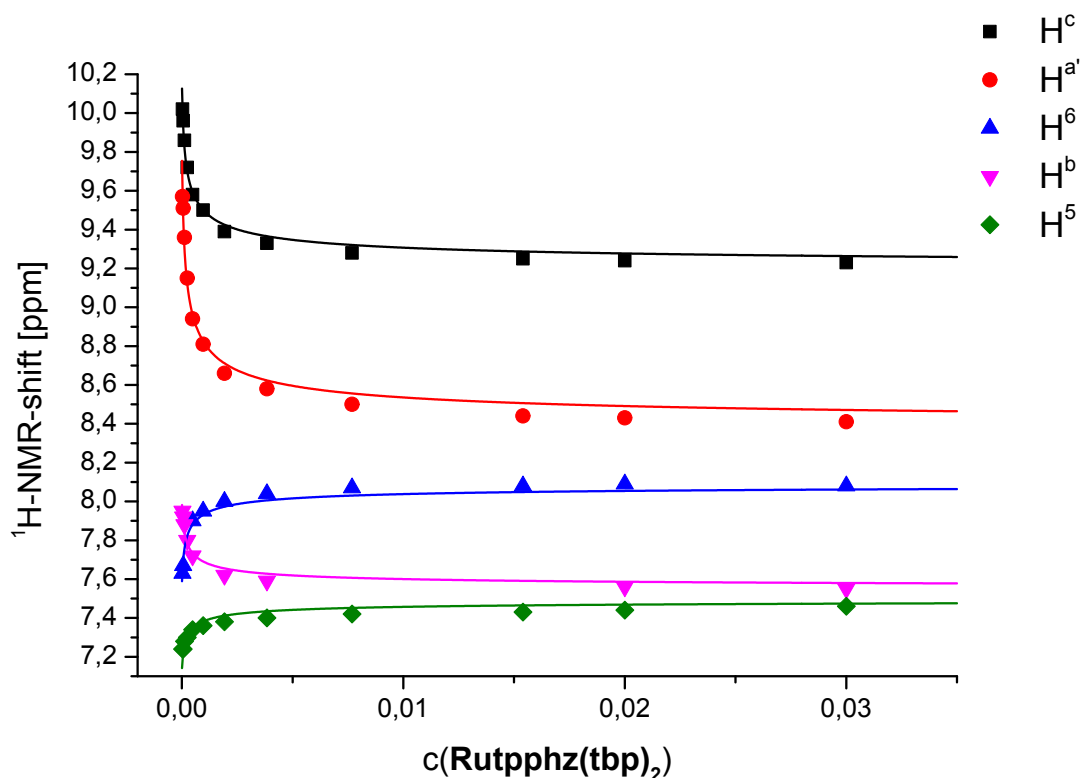

Figure 8: Plot of the shift of the ppm values of the protons c, a', 6, b and 5 of **Rutpphz(tbp)<sub>2</sub>** versus the concentration of the complex. The data points were treated with a least squares global fitting procedure using the following equation to yield the Dimerization constant  $K_D = 3634 \pm 176 \text{ M}^{-1.5}$

$$\delta_{obs} = \delta_m + (\delta_d - \delta_m) \frac{\sqrt{1 + 8K_D[M]} - 1}{\sqrt{1 + 8K_D[M]} + 1}$$

Fit statistics: reduced  $\chi^2 = 0.00125$ , adjusted  $R^2 = 0.99832$ .

Fit parameters:  $K_D$  is shared for all curves due to the global fit;  $\delta_m$  and  $\delta_d$  were set as a constant for each proton using the values shown in Figure 7.



## 6. Change of the photophysical properties of $\text{tpphz}(\text{tbp})_2$

In an experiment we prepared a stock solution ( $66.0 \mu\text{m}$ ) and measured immediately the absorption- and emission-properties ( $5 \mu\text{m}$ ) (dashed line in figures below). The stock solution was held under ambient light for 15 d. Afterwards again the absorption and emission properties were measured (dotted line in the figures below).

The absorption bands at 273 nm and 330 nm decrease significantly and the fine structure of the bands between 350 nm and 400 nm disappears. The emission band at 473 nm decreases and a new emission band rises at 503 nm.

The reason for this behavior is not clear yet. One possible explanation could be a complicated aggregation processes in solution, maybe enhanced by the  $\pi$ -attraction, which leads to this change of photo physical properties. Further investigation into this interesting behavior is underway.

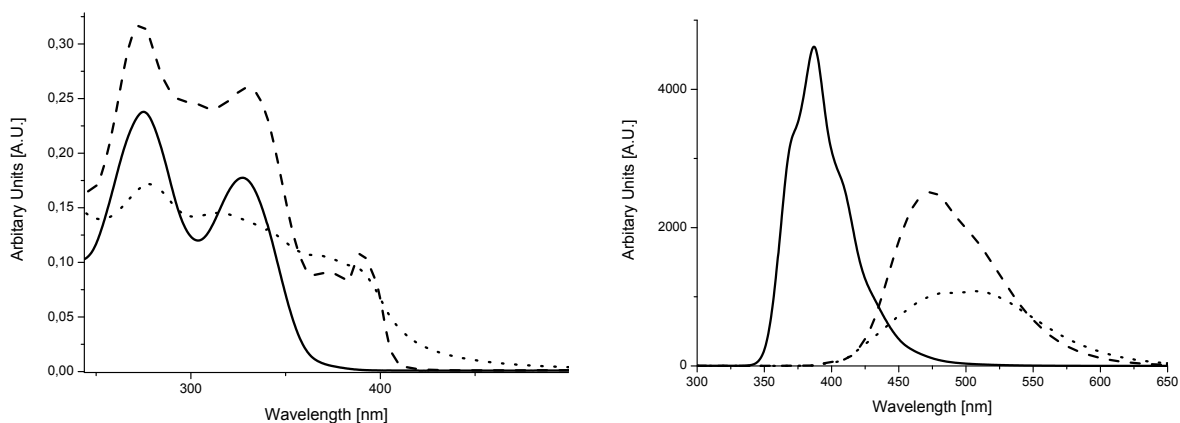

Left: Absorption spectra and right: emission spectra of  $\text{phen}(\text{tbp})_2$  (solid),  $\text{tpphz}(\text{tbp})_2$  solution freshly prepared (dashed),  $\text{tpphz}(\text{tbp})_2$  after 15 d in solution with  $\text{CH}_2\text{Cl}_2$  (DCM).

## 7. Details to the crystal structures

Table 1. Crystal data and structure refinement for **phenBr<sub>2</sub>O<sub>2</sub>X**

|                                   |                                                                               |                 |
|-----------------------------------|-------------------------------------------------------------------------------|-----------------|
| Empirical formula                 | C <sub>15</sub> H <sub>10</sub> Br <sub>2</sub> N <sub>2</sub> O <sub>2</sub> |                 |
| Formula weight                    | 410.07                                                                        |                 |
| Temperature                       | 150(2) K                                                                      |                 |
| Wavelength                        | 0.71073 Å                                                                     |                 |
| Crystal system                    | Triclinic                                                                     |                 |
| Space group                       | <i>P</i> -1                                                                   |                 |
| Unit cell dimensions              | a = 6.9502(7) Å                                                               | α = 82.560(7)°. |
|                                   | b = 10.2517(9) Å                                                              | β = 78.404(8)°. |
|                                   | c = 10.6485(9) Å                                                              | γ = 75.662(8)°. |
| Volume                            | 717.54(12) Å <sup>3</sup>                                                     |                 |
| Z                                 | 2                                                                             |                 |
| Density (calculated)              | 1.898 Mg/m <sup>3</sup>                                                       |                 |
| Absorption coefficient            | 5.653 mm <sup>-1</sup>                                                        |                 |
| F(000)                            | 400                                                                           |                 |
| Crystal size                      | 0.3807 x 0.1388 x 0.0429 mm <sup>3</sup>                                      |                 |
| Theta range for data collection   | 3.441 to 26.372°.                                                             |                 |
| Index ranges                      | -8 ≤ h ≤ 8, -12 ≤ k ≤ 10, -13 ≤ l ≤ 13                                        |                 |
| Reflections collected             | 5644                                                                          |                 |
| Independent reflections           | 2927 [R(int) = 0.0317]                                                        |                 |
| Completeness to theta = 25.242°   | 99.7 %                                                                        |                 |
| Refinement method                 | Full-matrix least-squares on F <sup>2</sup>                                   |                 |
| Data / restraints / parameters    | 2927 / 0 / 192                                                                |                 |
| Goodness-of-fit on F <sup>2</sup> | 1.108                                                                         |                 |
| Final R indices [I > 2σ(I)]       | R <sub>1</sub> = 0.0394, wR <sub>2</sub> = 0.1080                             |                 |
| R indices (all data)              | R <sub>1</sub> = 0.0474, wR <sub>2</sub> = 0.1148                             |                 |
| Largest diff. peak and hole       | 1.027 and -0.758 e·Å <sup>-3</sup>                                            |                 |

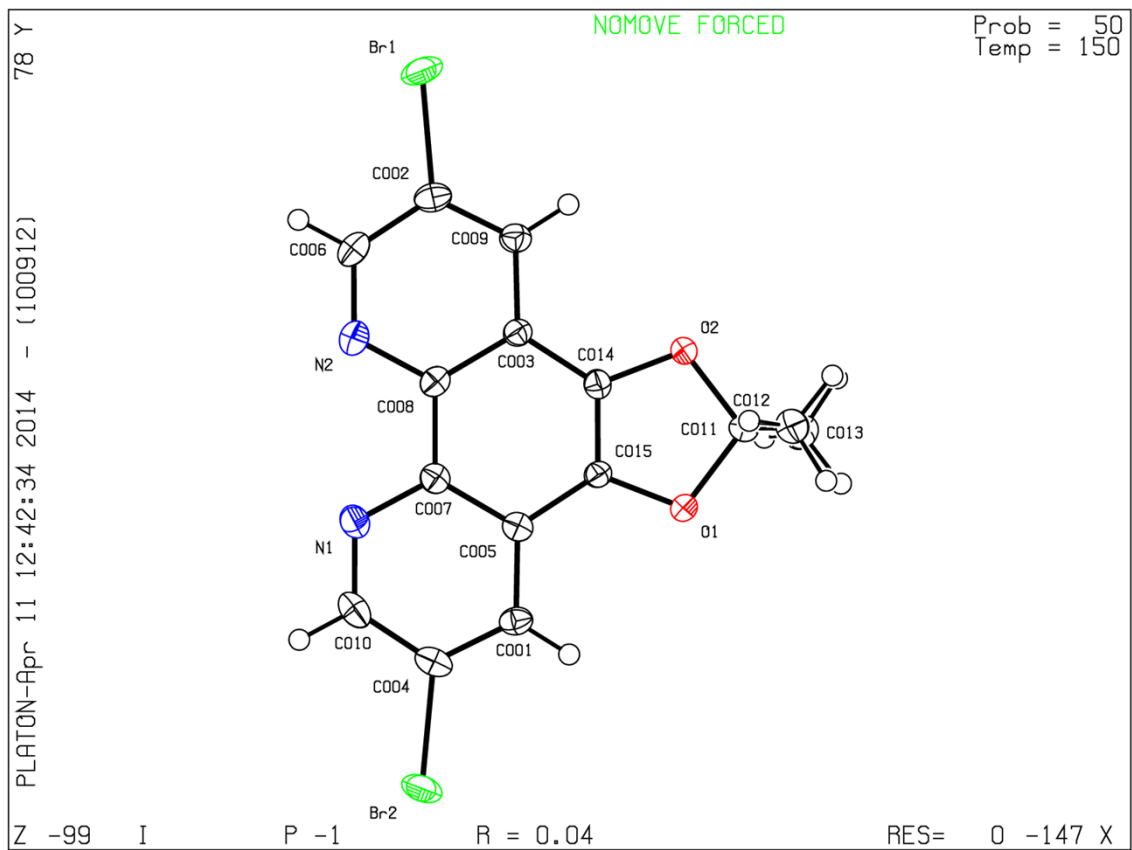

Figure 9: ORTEP representation of **phenBr<sub>2</sub>O<sub>2</sub>X**, probability ellipsoids given at 50 %.

Table 2. Crystal data and structure refinement for **phen(tbp)<sub>2</sub>O<sub>2</sub>X**

|                                   |                                                                               |                  |
|-----------------------------------|-------------------------------------------------------------------------------|------------------|
| Empirical formula                 | C <sub>36</sub> H <sub>37</sub> Cl <sub>3</sub> N <sub>2</sub> O <sub>2</sub> |                  |
| Formula weight                    | 636.02                                                                        |                  |
| Temperature                       | 150(2) K                                                                      |                  |
| Wavelength                        | 1.54184 Å                                                                     |                  |
| Crystal system                    | Triclinic                                                                     |                  |
| Space group                       | <i>P</i> -1                                                                   |                  |
| Unit cell dimensions              | a = 10.9557(7) Å                                                              | α = 104.299(5)°. |
|                                   | b = 11.8569(7) Å                                                              | β = 109.647(6)°. |
|                                   | c = 14.1102(9) Å                                                              | γ = 95.094(5)°.  |
| Volume                            | 1642.82(19) Å <sup>3</sup>                                                    |                  |
| Z                                 | 2                                                                             |                  |
| Density (calculated)              | 1.286 Mg/m <sup>3</sup>                                                       |                  |
| Absorption coefficient            | 2.792 mm <sup>-1</sup>                                                        |                  |
| F(000)                            | 668                                                                           |                  |
| Crystal size                      | 0.3391 x 0.1704 x 0.151 mm <sup>3</sup>                                       |                  |
| Theta range for data collection   | 7.593 to 73.963°.                                                             |                  |
| Index ranges                      | -13 ≤ h ≤ 12, -14 ≤ k ≤ 14, -17 ≤ l ≤ 17                                      |                  |
| Reflections collected             | 11349                                                                         |                  |
| Independent reflections           | 6421 [R(int) = 0.0188]                                                        |                  |
| Completeness to theta = 67.684°   | 99.5 %                                                                        |                  |
| Refinement method                 | Full-matrix least-squares on F <sup>2</sup>                                   |                  |
| Data / restraints / parameters    | 6421 / 0 / 420                                                                |                  |
| Goodness-of-fit on F <sup>2</sup> | 1.028                                                                         |                  |
| Final R indices [I > 2σ(I)]       | R1 = 0.0561, wR2 = 0.1450                                                     |                  |
| R indices (all data)              | R1 = 0.0588, wR2 = 0.1474                                                     |                  |
| Largest diff. peak and hole       | 1.322 and -0.537 e·Å <sup>-3</sup>                                            |                  |

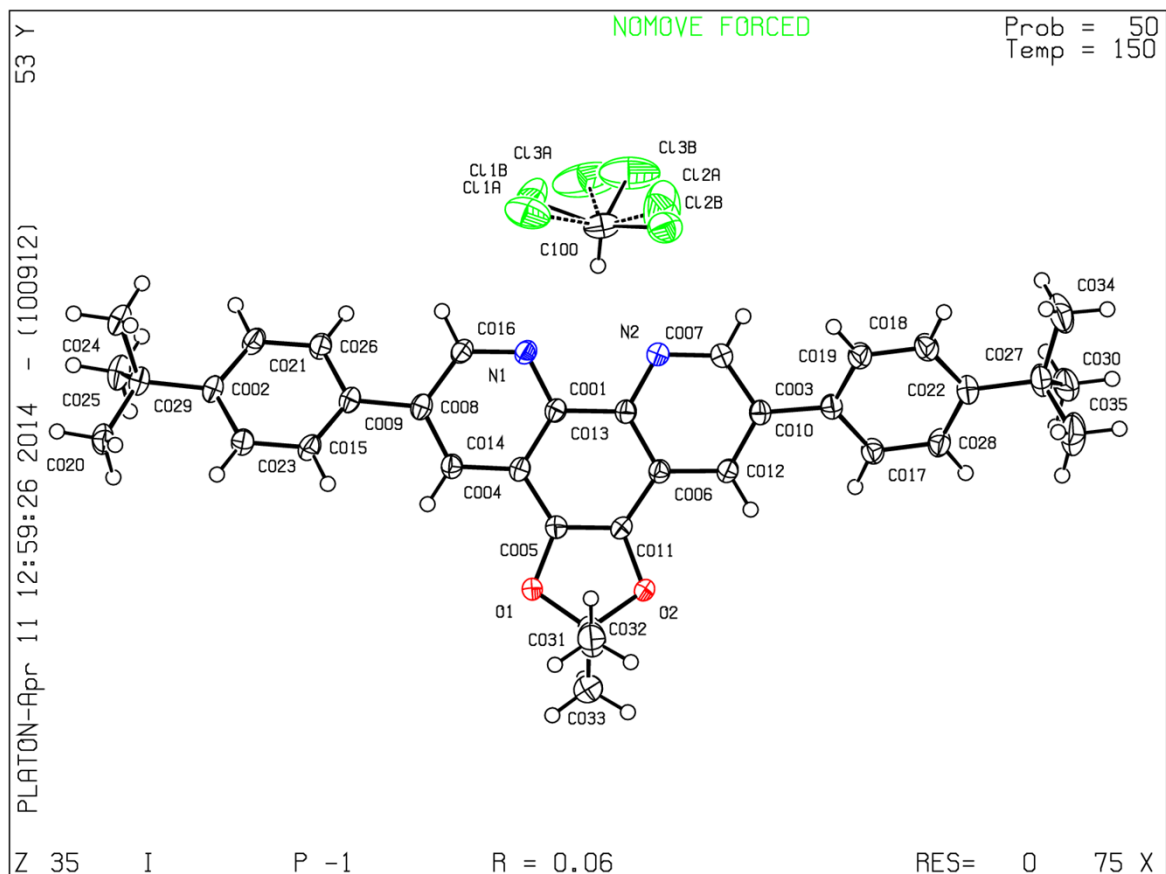

Figure 10: ORTEP representation of  $\text{phen}(\text{tbp})_2\text{O}_2\text{X}$ , probability ellipsoids given at 50 %.

Table 3. Crystal data and structure refinement for **phen(tbp)<sub>2</sub>**.

|                                   |                                                               |                              |
|-----------------------------------|---------------------------------------------------------------|------------------------------|
| Empirical formula                 | C <sub>32</sub> H <sub>32</sub> N <sub>2</sub>                |                              |
| Formula weight                    | 444.59                                                        |                              |
| Temperature                       | 180(2) K                                                      |                              |
| Wavelength                        | 1.54178 Å                                                     |                              |
| Crystal system                    | Monoclinic                                                    |                              |
| Space group                       | <i>P</i> 2 <sub>1</sub> / <i>n</i>                            |                              |
| Unit cell dimensions              | <i>a</i> = 16.2831(12) Å                                      | $\alpha = 90^\circ$ .        |
|                                   | <i>b</i> = 9.4620(5) Å                                        | $\beta = 115.158(8)^\circ$ . |
|                                   | <i>c</i> = 17.5232(11) Å                                      | $\gamma = 90^\circ$ .        |
| Volume                            | 2443.7(3) Å <sup>3</sup>                                      |                              |
| <i>Z</i>                          | 4                                                             |                              |
| Density (calculated)              | 1.208 Mg/m <sup>3</sup>                                       |                              |
| Absorption coefficient            | 0.531 mm <sup>-1</sup>                                        |                              |
| F(000)                            | 952                                                           |                              |
| Crystal size                      | 0.2384 x 0.0985 x 0.0427 mm <sup>3</sup>                      |                              |
| Theta range for data collection   | 7.604 to 74.114°.                                             |                              |
| Index ranges                      | -20 ≤ <i>h</i> ≤ 16, -11 ≤ <i>k</i> ≤ 11, -21 ≤ <i>l</i> ≤ 21 |                              |
| Reflections collected             | 10148                                                         |                              |
| Independent reflections           | 4800 [R(int) = 0.0306]                                        |                              |
| Completeness to theta = 67.679°   | 99.6 %                                                        |                              |
| Refinement method                 | Full-matrix least-squares on F <sup>2</sup>                   |                              |
| Data / restraints / parameters    | 4800 / 0 / 335                                                |                              |
| Goodness-of-fit on F <sup>2</sup> | 1.037                                                         |                              |
| Final R indices [I > 2σ(I)]       | R1 = 0.0670, wR2 = 0.1870                                     |                              |
| R indices (all data)              | R1 = 0.0980, wR2 = 0.2194                                     |                              |
| Largest diff. peak and hole       | 0.486 and -0.231 e·Å <sup>-3</sup>                            |                              |

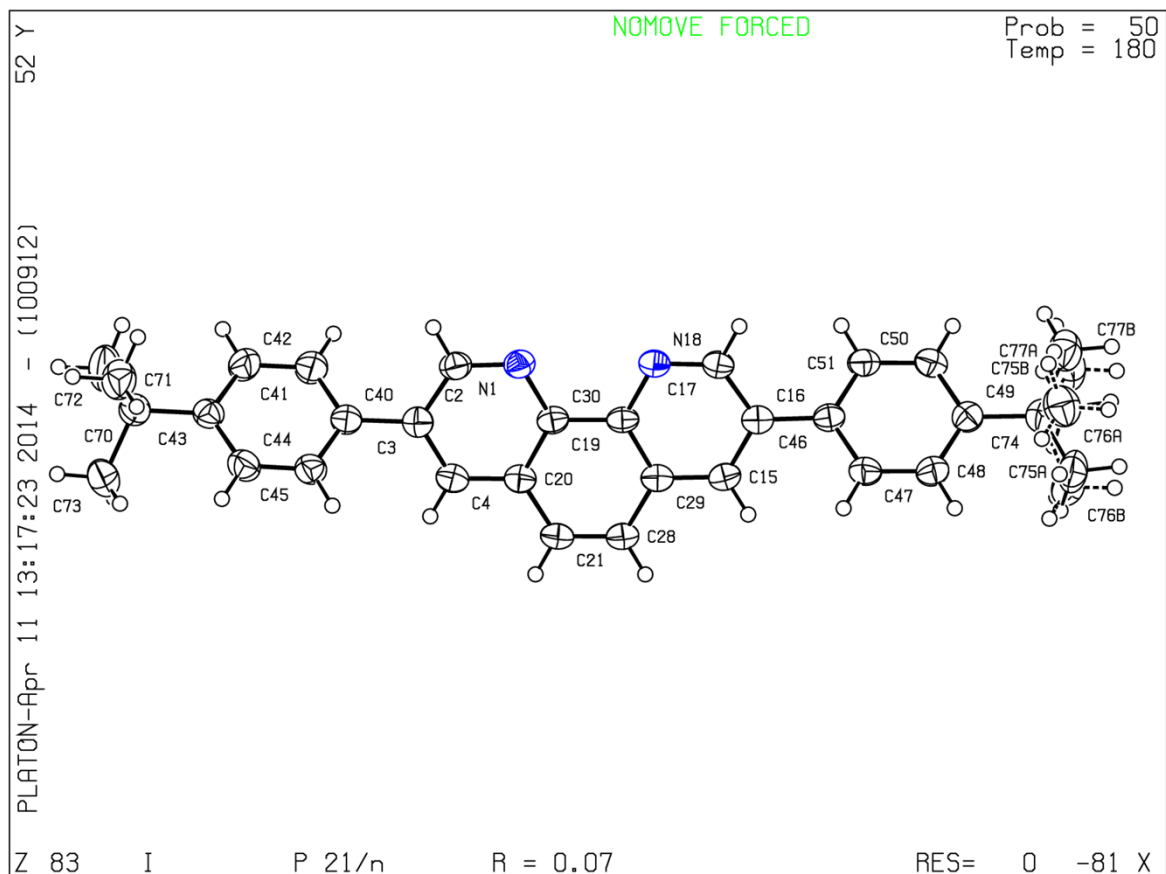

Figure 11: ORTEP representation of **phen(tbp)<sub>2</sub>**, probability ellipsoids given at 50 %. The *tert*-butyl group on the right-hand side is calculated on two alternative conformations.

Table 4. Crystal data and structure refinement for **phen(tbp)<sub>2</sub>O<sub>2</sub>**.

|                                   |                                                               |                 |
|-----------------------------------|---------------------------------------------------------------|-----------------|
| Empirical formula                 | C <sub>32</sub> H <sub>30</sub> N <sub>2</sub> O <sub>2</sub> |                 |
| Formula weight                    | 474.58                                                        |                 |
| Temperature                       | 150(2) K                                                      |                 |
| Wavelength                        | 1.54178 Å                                                     |                 |
| Crystal system                    | Triclinic                                                     |                 |
| Space group                       | <i>P</i> -1                                                   |                 |
| Unit cell dimensions              | a = 6.3897(4) Å                                               | α = 97.594(6)°. |
|                                   | b = 10.1543(7) Å                                              | β = 91.675(5)°. |
|                                   | c = 19.0511(13) Å                                             | γ = 92.920(6)°. |
| Volume                            | 1222.85(14) Å <sup>3</sup>                                    |                 |
| Z                                 | 2                                                             |                 |
| Density (calculated)              | 1.289 Mg/m <sup>3</sup>                                       |                 |
| Absorption coefficient            | 0.630 mm <sup>-1</sup>                                        |                 |
| F(000)                            | 504                                                           |                 |
| Crystal size                      | 0.2878 x 0.077 x 0.048 mm <sup>3</sup>                        |                 |
| Theta range for data collection   | 7.412 to 73.739°.                                             |                 |
| Index ranges                      | -7 ≤ h ≤ 7, -12 ≤ k ≤ 10, -23 ≤ l ≤ 23                        |                 |
| Reflections collected             | 14141                                                         |                 |
| Independent reflections           | 4802 [R(int) = 0.0317]                                        |                 |
| Completeness to theta = 67.679°   | 99.7 %                                                        |                 |
| Refinement method                 | Full-matrix least-squares on F <sup>2</sup>                   |                 |
| Data / restraints / parameters    | 4802 / 0 / 325                                                |                 |
| Goodness-of-fit on F <sup>2</sup> | 1.079                                                         |                 |
| Final R indices [I > 2σ(I)]       | R1 = 0.0467, wR2 = 0.1165                                     |                 |
| R indices (all data)              | R1 = 0.0653, wR2 = 0.1285                                     |                 |
| Largest diff. peak and hole       | 0.241 and -0.192 e·Å <sup>-3</sup>                            |                 |



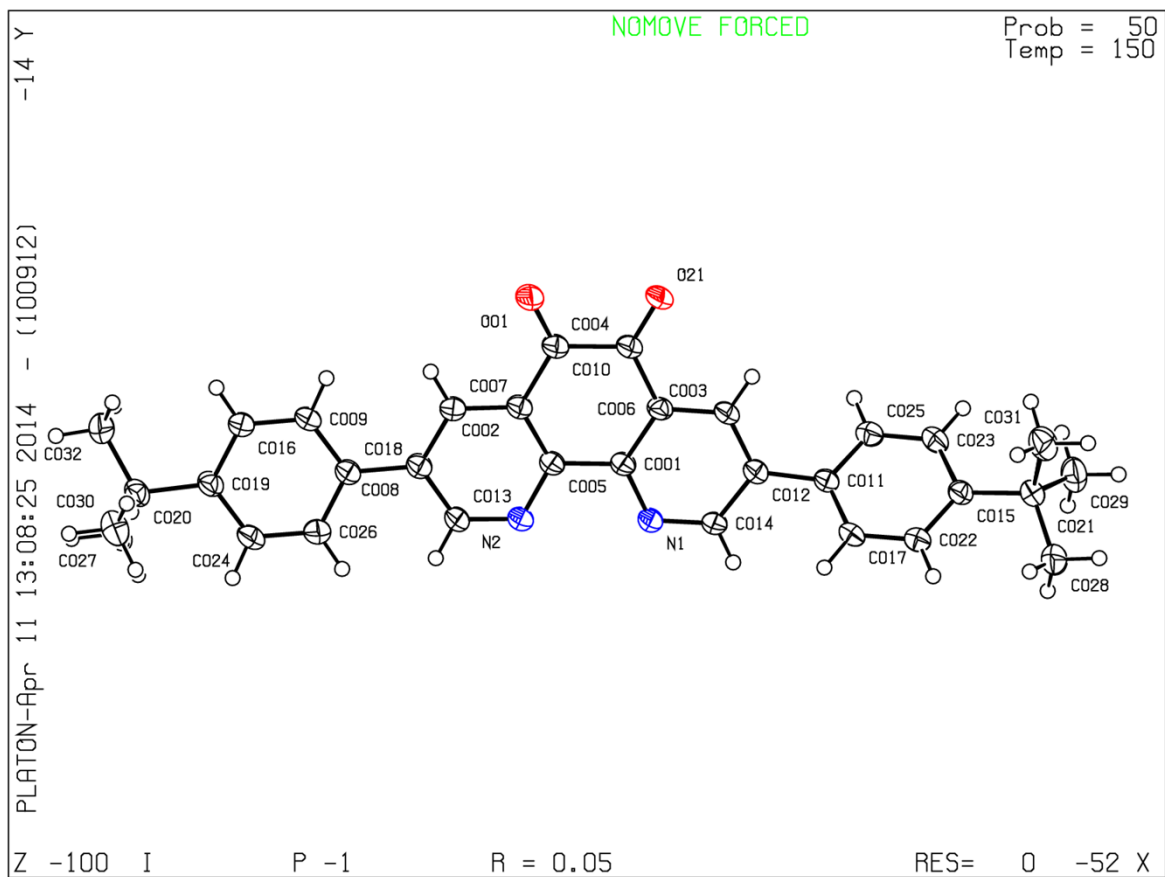

Figure 12: ORTEP representation of **phen(tbp)<sub>2</sub>O<sub>2</sub>**, probability ellipsoids given at 50

Table 5. Crystal data and structure refinement for **tpphz(tbp)<sub>2</sub>**.

|                                   |                                                                |                 |
|-----------------------------------|----------------------------------------------------------------|-----------------|
| Empirical formula                 | C <sub>47</sub> H <sub>42</sub> Cl <sub>6</sub> N <sub>6</sub> |                 |
| Formula weight                    | 903.56                                                         |                 |
| Temperature                       | 180(2) K                                                       |                 |
| Wavelength                        | 1.54178 Å                                                      |                 |
| Crystal system                    | Triclinic                                                      |                 |
| Space group                       | P -1                                                           |                 |
| Unit cell dimensions              | a = 7.6741(4) Å                                                | α = 73.800(4)°. |
|                                   | b = 15.7010(6) Å                                               | β = 88.093(4)°. |
|                                   | c = 19.5176(8) Å                                               | γ = 86.939(4)°. |
| Volume                            | 2254.68(18) Å <sup>3</sup>                                     |                 |
| Z                                 | 2                                                              |                 |
| Density (calculated)              | 1.331 Mg/m <sup>3</sup>                                        |                 |
| Absorption coefficient            | 3.790 mm <sup>-1</sup>                                         |                 |
| F(000)                            | 936                                                            |                 |
| Crystal size                      | 0.1408 x 0.0925 x 0.044 mm <sup>3</sup>                        |                 |
| Theta range for data collection   | 7.397 to 74.491°.                                              |                 |
| Index ranges                      | -9 ≤ h ≤ 9, -14 ≤ k ≤ 19, -23 ≤ l ≤ 24                         |                 |
| Reflections collected             | 22502                                                          |                 |
| Independent reflections           | 9194 [R(int) = 0.0424]                                         |                 |
| Completeness to theta = 67.679°   | 99.7 %                                                         |                 |
| Refinement method                 | Full-matrix least-squares on F <sup>2</sup>                    |                 |
| Data / restraints / parameters    | 9194 / 0 / 542                                                 |                 |
| Goodness-of-fit on F <sup>2</sup> | 1.114                                                          |                 |
| Final R indices [I > 2σ(I)]       | R1 = 0.0730, wR2 = 0.2191                                      |                 |
| R indices (all data)              | R1 = 0.0945, wR2 = 0.2337                                      |                 |
| Largest diff. peak and hole       | 1.090 and -0.514 e·Å <sup>-3</sup>                             |                 |

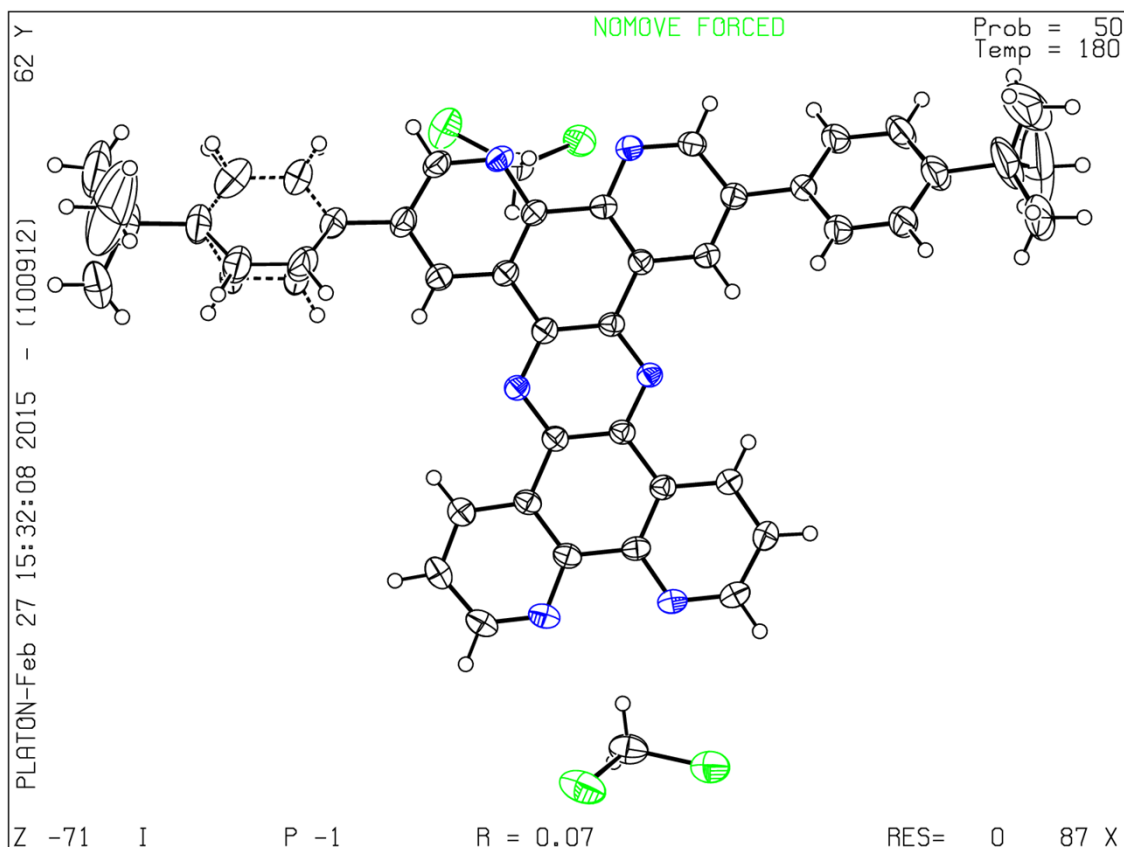

Figure 13: ORTEP representation of **tpphz(tbp)<sub>2</sub>**, probability ellipsoids given at 50 %. The anisotropic parameters of the C-atoms in the *tert.*-butyl- are enlarged due to structural disorder. The phenyl substituent on the left-hand side is calculated in two alternative conformations with respect to their twist relative to the adjacent pyridyl moiety.

Table 6. Crystal data and structure refinement for **Ru(tbp)<sub>2</sub>tpphz**.

|                                   |                                                                                    |                   |
|-----------------------------------|------------------------------------------------------------------------------------|-------------------|
| Empirical formula                 | C <sub>96</sub> H <sub>108</sub> F <sub>12</sub> N <sub>18</sub> P <sub>2</sub> Ru |                   |
| Formula weight                    | 1905.01                                                                            |                   |
| Temperature                       | 180(2) K                                                                           |                   |
| Wavelength                        | 1.54178 Å                                                                          |                   |
| Crystal system                    | Monoclinic                                                                         |                   |
| Space group                       | C 2/c                                                                              |                   |
| Unit cell dimensions              | a = 51.8116(7) Å                                                                   | α = 90°.          |
|                                   | b = 15.1574(2) Å                                                                   | β = 91.5900(10)°. |
|                                   | c = 25.2431(3) Å                                                                   | γ = 90°.          |
| Volume                            | 19816.5(4) Å <sup>3</sup>                                                          |                   |
| Z                                 | 8                                                                                  |                   |
| Density (calculated)              | 1.277 Mg/m <sup>3</sup>                                                            |                   |
| Absorption coefficient            | 2.222 mm <sup>-1</sup>                                                             |                   |
| F(000)                            | 7936                                                                               |                   |
| Crystal size                      | 0.2072 x 0.1366 x 0.0946 mm <sup>3</sup>                                           |                   |
| Theta range for data collection   | 7.452 to 72.564°.                                                                  |                   |
| Index ranges                      | -47 ≤ h ≤ 62, -18 ≤ k ≤ 18, -31 ≤ l ≤ 30                                           |                   |
| Reflections collected             | 56735                                                                              |                   |
| Independent reflections           | 19053 [R(int) = 0.0289]                                                            |                   |
| Completeness to theta = 67.679°   | 99.3 %                                                                             |                   |
| Refinement method                 | Full-matrix least-squares on F <sup>2</sup>                                        |                   |
| Data / restraints / parameters    | 19053 / 6 / 991                                                                    |                   |
| Goodness-of-fit on F <sup>2</sup> | 0.780                                                                              |                   |
| Final R indices [I > 2σ(I)]       | R1 = 0.0495, wR2 = 0.1341                                                          |                   |
| R indices (all data)              | R1 = 0.0675, wR2 = 0.1472                                                          |                   |
| Largest diff. peak and hole       | 0.725 and -0.588 e·Å <sup>-3</sup>                                                 |                   |

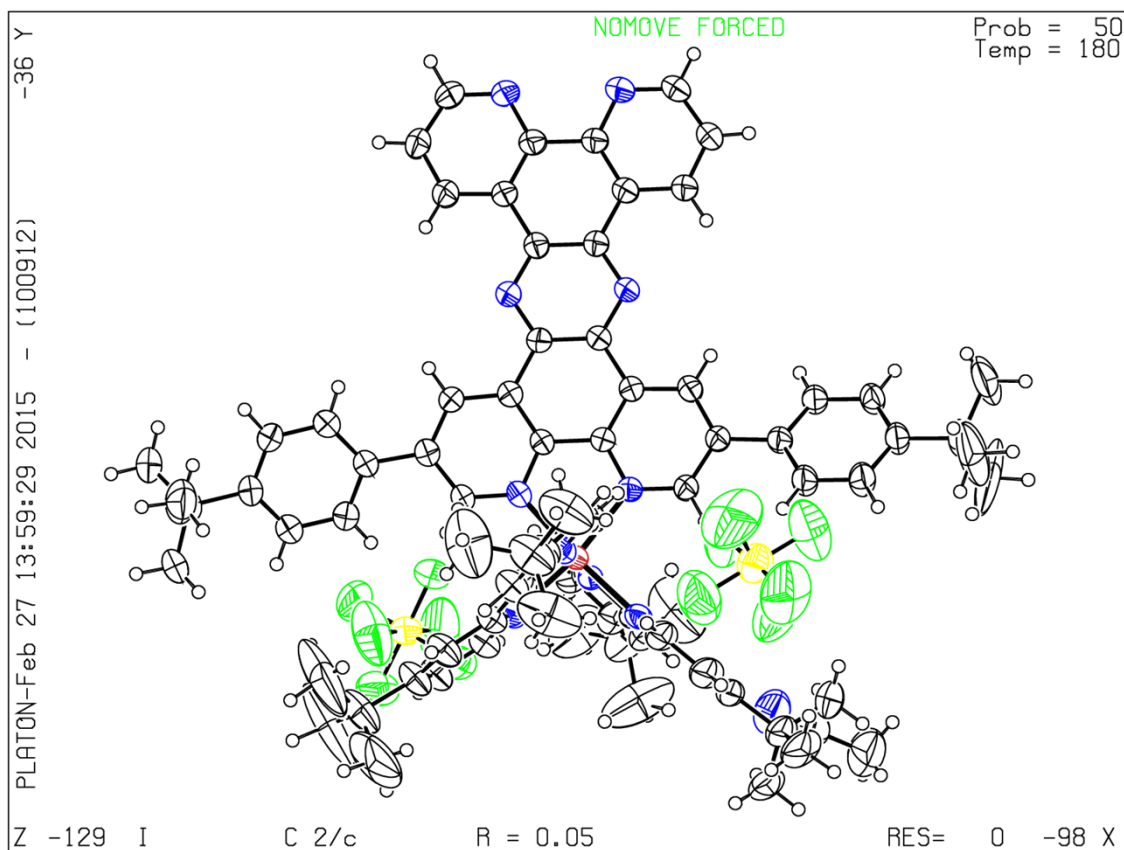

Figure 14: ORTEP representation of **Ru(tbp)<sub>2</sub>tpphz**, probability ellipsoids given at 50 %. The anisotropic parameters of the C-atoms in the *tert.*-butyl-groups and of the F-atoms in the PF<sub>6</sub><sup>-</sup>-anion are enlarged due to structural disorder.

Table 7. Crystal data and structure refinement for **Rutpphz(tbp)<sub>2</sub>**.

|                                   |                                                                                                            |
|-----------------------------------|------------------------------------------------------------------------------------------------------------|
| Empirical formula                 | C <sub>85.50</sub> H <sub>95</sub> Cl <sub>11</sub> F <sub>12</sub> N <sub>10</sub> P <sub>2</sub> Ru      |
| Formula weight                    | 2043.67                                                                                                    |
| Temperature                       | 150(2) K                                                                                                   |
| Wavelength                        | 0.71073 Å                                                                                                  |
| Crystal system                    | Monoclinic                                                                                                 |
| Space group                       | C 2/c                                                                                                      |
| Unit cell dimensions              | a = 45.6046(9) Å      α = 90°.<br>b = 22.1737(4) Å      β = 116.956(3)°.<br>c = 21.5480(6) Å      γ = 90°. |
| Volume                            | 19422.5(9) Å <sup>3</sup>                                                                                  |
| Z                                 | 8                                                                                                          |
| Density (calculated)              | 1.398 Mg/m <sup>3</sup>                                                                                    |
| Absorption coefficient            | 0.567 mm <sup>-1</sup>                                                                                     |
| F(000)                            | 8376                                                                                                       |
| Crystal size                      | 0.122 x 0.1019 x 0.0639 mm <sup>3</sup>                                                                    |
| Theta range for data collection   | 3.408 to 26.372°.                                                                                          |
| Index ranges                      | -56 ≤ h ≤ 56, -27 ≤ k ≤ 26, -26 ≤ l ≤ 24                                                                   |
| Reflections collected             | 62965                                                                                                      |
| Independent reflections           | 19815 [R(int) = 0.0580]                                                                                    |
| Completeness to theta = 25.242°   | 99.7 %                                                                                                     |
| Refinement method                 | Full-matrix least-squares on F <sup>2</sup>                                                                |
| Data / restraints / parameters    | 19815 / 0 / 1037                                                                                           |
| Goodness-of-fit on F <sup>2</sup> | 0.985                                                                                                      |
| Final R indices [I > 2σ(I)]       | R1 = 0.0531, wR2 = 0.1383                                                                                  |
| R indices (all data)              | R1 = 0.0793, wR2 = 0.1510                                                                                  |
| Largest diff. peak and hole       | 0.608 and -0.496 e·Å <sup>-3</sup>                                                                         |

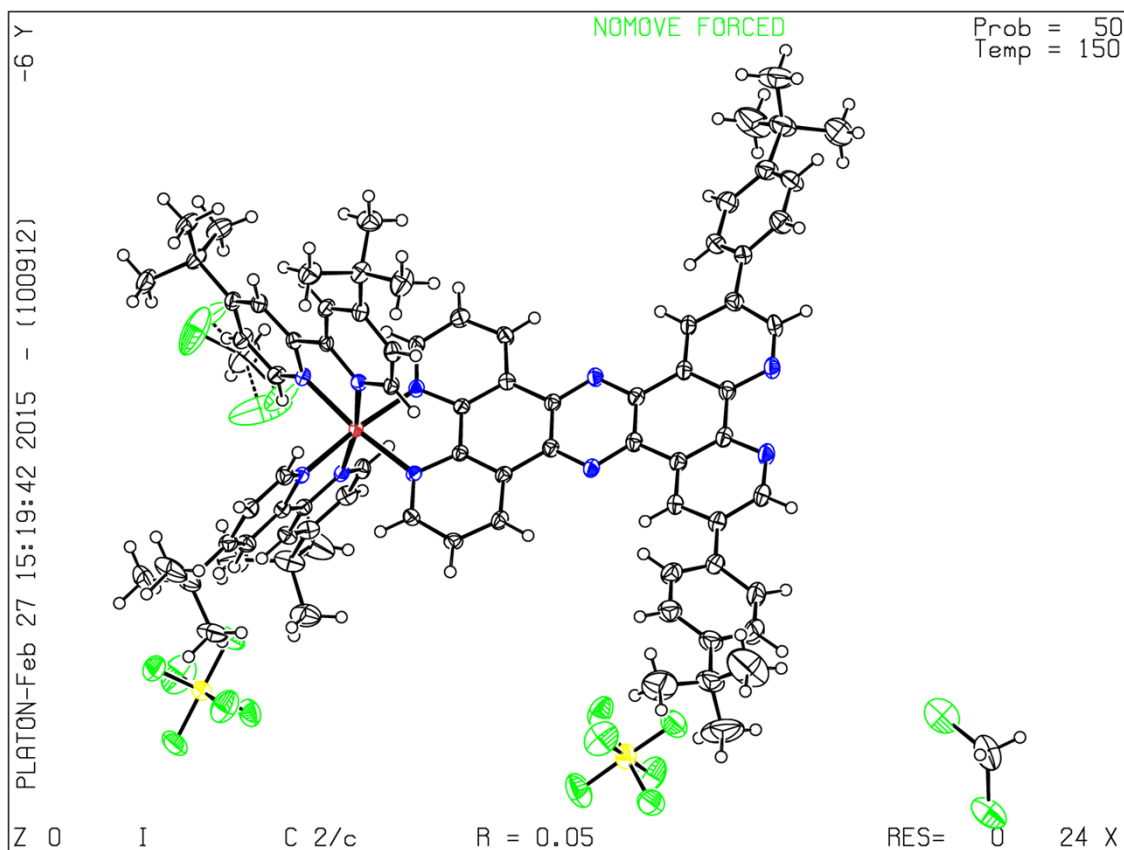

Figure 15: ORTEP representation of **Rutpphz(tbp)<sub>2</sub>**, probability ellipsoids given at 50 %. The anisotropic parameters of the C-atoms in the *tert.*-butyl-groups, of the F-atoms in the hexafluorophosphate-anion and of the Cl-atoms in dichloromethane are enlarged due to structural disorder.

Table 8. Crystal data and structure refinement for **Ru(tbp)<sub>2</sub>tpphzRu**

|                                   |                                                                                                                       |                  |
|-----------------------------------|-----------------------------------------------------------------------------------------------------------------------|------------------|
| Empirical formula                 | C <sub>143.50</sub> H <sub>198</sub> F <sub>24</sub> N <sub>14</sub> O <sub>5.50</sub> P <sub>4</sub> Ru <sub>2</sub> |                  |
| Formula weight                    | 2989.17                                                                                                               |                  |
| Temperature                       | 150(2) K                                                                                                              |                  |
| Wavelength                        | 1.54178 Å                                                                                                             |                  |
| Crystal system                    | Monoclinic                                                                                                            |                  |
| Space group                       | I 2/a                                                                                                                 |                  |
| Unit cell dimensions              | a = 19.8215(8) Å                                                                                                      | α = 90°.         |
|                                   | b = 44.8370(12) Å                                                                                                     | β = 106.727(3)°. |
|                                   | c = 19.8740(5) Å                                                                                                      | γ = 90°.         |
| Volume                            | 16915.4(10) Å <sup>3</sup>                                                                                            |                  |
| Z                                 | 4                                                                                                                     |                  |
| Density (calculated)              | 1.174 Mg/m <sup>3</sup>                                                                                               |                  |
| Absorption coefficient            | 2.450 mm <sup>-1</sup>                                                                                                |                  |
| F(000)                            | 6260                                                                                                                  |                  |
| Crystal size                      | 0.2754 x 0.1604 x 0.1417 mm <sup>3</sup>                                                                              |                  |
| Theta range for data collection   | 7.480 to 74.464°.                                                                                                     |                  |
| Index ranges                      | -24 ≤ h ≤ 14, -56 ≤ k ≤ 52, -23 ≤ l ≤ 22                                                                              |                  |
| Reflections collected             | 26007                                                                                                                 |                  |
| Independent reflections           | 14622 [R(int) = 0.0349]                                                                                               |                  |
| Completeness to theta = 67.679°   | 86.3 %                                                                                                                |                  |
| Refinement method                 | Full-matrix least-squares on F <sup>2</sup>                                                                           |                  |
| Data / restraints / parameters    | 14622 / 46 / 977                                                                                                      |                  |
| Goodness-of-fit on F <sup>2</sup> | 1.062                                                                                                                 |                  |
| Final R indices [I > 2σ(I)]       | R1 = 0.0658, wR2 = 0.1932                                                                                             |                  |
| R indices (all data)              | R1 = 0.0926, wR2 = 0.2178                                                                                             |                  |
| Largest diff. peak and hole       | 0.978 and -0.669 e·Å <sup>-3</sup>                                                                                    |                  |



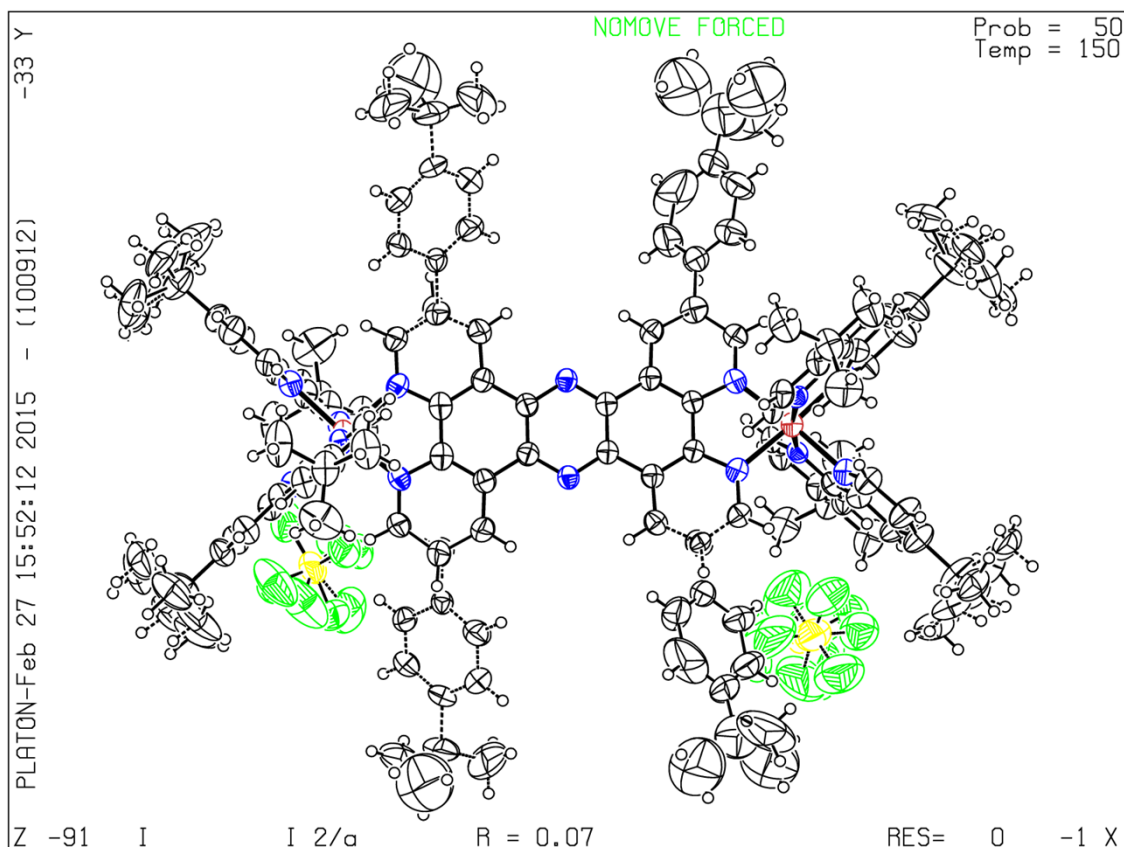

Figure 16: ORTEP representation of **Ru(tbp)<sub>2</sub>tpphzRu**, probability ellipsoids given at 50 %. The anisotropic parameters of the C-atoms in the *tert*-butyl-groups and of the F-atoms in the PF<sub>6</sub>-anion are enlarged due to structural disorder. The *tert*-butylphenyl substituents can be found on either side of the bridging ligand with respect to the crystal packing. Adjacent PF<sub>6</sub>-anions are found on different positions in the lattice accordingly.

Table 9. Crystal data and structure refinement for **Ru(tbp)<sub>2</sub>phen**.

|                                   |                                                                                        |                  |
|-----------------------------------|----------------------------------------------------------------------------------------|------------------|
| Empirical formula                 | C <sub>75</sub> H <sub>90.50</sub> F <sub>12</sub> N <sub>9.50</sub> P <sub>2</sub> Ru |                  |
| Formula weight                    | 1516.07                                                                                |                  |
| Temperature                       | 180(2) K                                                                               |                  |
| Wavelength                        | 1.54178 Å                                                                              |                  |
| Crystal system                    | Triclinic                                                                              |                  |
| Space group                       | P -1                                                                                   |                  |
| Unit cell dimensions              | a = 15.7991(4) Å                                                                       | α = 104.461(2)°. |
|                                   | b = 16.8342(4) Å                                                                       | β = 116.670(3)°. |
|                                   | c = 16.8521(5) Å                                                                       | γ = 92.680(2)°.  |
| Volume                            | 3812.4(2) Å <sup>3</sup>                                                               |                  |
| Z                                 | 2                                                                                      |                  |
| Density (calculated)              | 1.321 Mg/m <sup>3</sup>                                                                |                  |
| Absorption coefficient            | 2.711 mm <sup>-1</sup>                                                                 |                  |
| F(000)                            | 1578                                                                                   |                  |
| Crystal size                      | 0.2341 x 0.1185 x 0.0612 mm <sup>3</sup>                                               |                  |
| Theta range for data collection   | 7.407 to 74.493°.                                                                      |                  |
| Index ranges                      | -19 ≤ h ≤ 15, -20 ≤ k ≤ 20, -19 ≤ l ≤ 21                                               |                  |
| Reflections collected             | 42405                                                                                  |                  |
| Independent reflections           | 15533 [R(int) = 0.0357]                                                                |                  |
| Completeness to theta = 67.679°   | 99.7 %                                                                                 |                  |
| Refinement method                 | Full-matrix least-squares on F <sup>2</sup>                                            |                  |
| Data / restraints / parameters    | 15533 / 0 / 979                                                                        |                  |
| Goodness-of-fit on F <sup>2</sup> | 1.039                                                                                  |                  |
| Final R indices [I > 2σ(I)]       | R1 = 0.0430, wR2 = 0.1126                                                              |                  |
| R indices (all data)              | R1 = 0.0499, wR2 = 0.1200                                                              |                  |
| Largest diff. peak and hole       | 1.138 and -0.824 e·Å <sup>-3</sup>                                                     |                  |

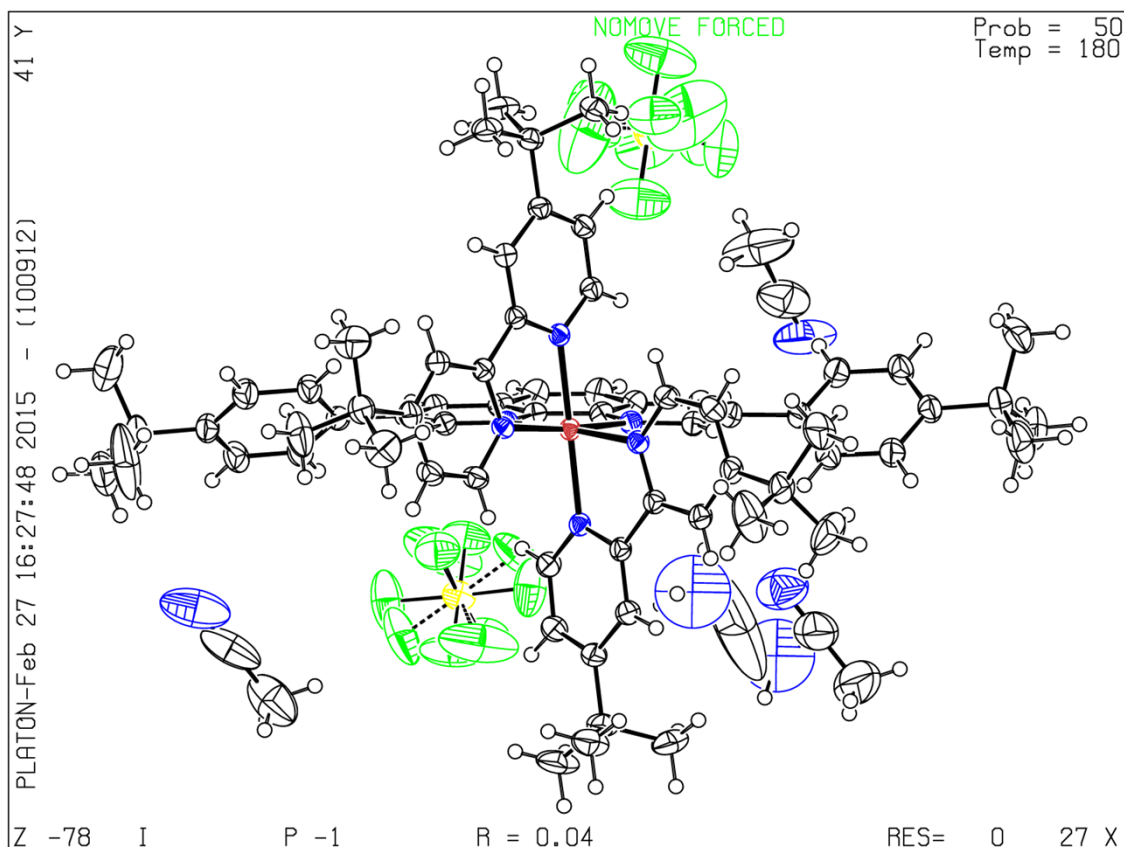

Figure 17: ORTEP representation of **Ru(tbp)<sub>2</sub>phen(PF<sub>6</sub>)<sub>2</sub>**, probability ellipsoids given at 50 %. The anisotropic parameters of the C-atoms in the *tert.*-butyl-groups and of the F-atoms in the PF<sub>6</sub>-anion are enlarged due to structural disorder. One molecule of water is distributed between two alternative positions.
